# Supplementary material
Source: HighWire-hosted journal article supplement (https://bjsm.bmj.com/content/52/15/972)
Supplement: inline-supplementary-material-1 [file inline-supplementary-material-1.docx]

Appendix I. Medline Search

(("Hip Pain" OR "femoroacetabular impingement"[tiab] OR "extra articular impingement"[tiab] OR "extraarticular impingement"[tiab] OR "psoas impingement"[tiab] OR ischiofemoral impingement[tiab] OR ischio femoral impingement[tiab] OR "subspine impingement"[tiab] OR anterior inferior iliac spine impingement[tiab] OR "AIIS impingement"[tiab] OR "trochanteric impingement"[tiab] OR pelvic impingement[tiab] OR "buttock pain"[tiab] OR piriformis[tiab] OR trochanter[tiab] OR "ischial tuberosity"[tiab] OR "hip impingement"[tiab] OR tenosynovitis[tiab] OR "tendon entrapment"[tiab] OR Acetabulum impingement[tiab] OR FAI[tiab] OR "femoracetabular impingement"[MeSH Terms] OR "Femoroacetabular Impingement"[tiab]) AND (Return to sport OR return to play OR reentry OR "return to" OR "Recovery of Function"[MeSH]) AND (Athletic Injuries OR Athletes OR Athlete OR Sports OR Sport)) AND (randomized controlled trial[pt] OR controlled clinical trial[pt] OR randomized[tiab] OR randomised[tiab] OR randomization[tiab] OR randomisation[tiab] OR placebo[tiab] OR drug therapy[sh] OR randomly[tiab] OR trial[tiab] OR groups[tiab] OR Clinical trial[pt] OR “clinical trial”[tiab] OR “clinical trials”[tiab] OR "evaluation studies"[Publication Type] OR "evaluation studies as topic"[MeSH Terms] OR "evaluation study"[tiab] OR evaluation studies[tiab] OR "intervention studies"[tiab] OR "intervention study"[tiab] OR "intervention studies"[tiab] OR "case-control studies"[MeSH Terms] OR "case-control"[tiab] OR "cohort studies"[MeSH Terms] OR cohort[tiab] OR "longitudinal studies"[MeSH Terms] OR "longitudinal”[tiab] OR longitudinally[tiab] OR "prospective"[tiab] OR prospectively[tiab] OR "retrospective studies"[MeSH Terms] OR "retrospective"[tiab] OR "follow up"[tiab] OR "comparative study"[Publication Type] OR "comparative study"[tiab] OR systematic[subset] OR "meta-analysis"[Publication Type] OR "meta-analysis as topic"[MeSH Terms] OR "meta-analysis"[tiab] OR "meta-analyses"[tiab]) NOT (Editorial[ptyp] OR Letter[ptyp] OR Case Reports[ptyp] OR Comment[ptyp]) NOT (animals[mh] NOT humans[mh])
